# Supplementary material for: Patterns of Health and Health Service Use in a Prospective Cohort of Aboriginal and Torres Strait Islander Children Aged 5–9 Years Living in Urban, Regional and Remote Areas of South Australia
Source: MDPI journal article supplement (doi:10.3390/ijerph20126172), 2023-06-19
Supplement: s1 [file s1]

**Supplementary Table S1. Characteristics of families participating in Waves 1 and 2 of the Aboriginal Families Study.**

|                                                               | <b>Wave 1<br/>(n= 344)</b> | <b>Wave 2<br/>(n= 246)</b> |
|---------------------------------------------------------------|----------------------------|----------------------------|
|                                                               | <b>n (%)</b>               | <b>n (%)</b>               |
| <b>Mothers' age at birth of study child</b>                   |                            |                            |
| 15-19 years                                                   | 55 (16.0)                  | 36 (14.6)                  |
| 20-24 years                                                   | 140 (40.7)                 | 99 (40.2)                  |
| 25-29 years                                                   | 91 (26.5)                  | 67 (27.2)                  |
| 30 - 35 years                                                 | 33 (9.6)                   | 27 (11.0)                  |
| > 35 years                                                    | 25 (7.3)                   | 17 (6.9)                   |
| <b>Mothers' indigenous status</b>                             |                            |                            |
| Aboriginal and/or Torres Strait Islander                      | 319 (92.7)                 | 226 (91.9)                 |
| Not Aboriginal or Torres Strait Islander <sup>1</sup>         | 25 (7.3)                   | 20 (8.1)                   |
| <b>Birth weight of study child</b>                            |                            |                            |
| <2,500 grams                                                  | 49 (15.0)                  | 31 (13.4)                  |
| ≥2,500 grams                                                  | 278 (85.0)                 | 201 (86.6)                 |
| <b>Gestation at birth of study child</b>                      |                            |                            |
| ≥37 weeks                                                     | 278 (86.9)                 | 198 (86.1)                 |
| <37 weeks                                                     | 42 (13.1)                  | 32 (13.9)                  |
| <b>Study child born small for gestational age</b>             |                            |                            |
| ≥10th percentile                                              | 240 (79.7)                 | 174 (80.9)                 |
| <10th percentile                                              | 61 (20.3)                  | 41 (19.1)                  |
| <b>Mothers' place of residence at wave 1</b>                  |                            |                            |
| Metropolitan area                                             | 134 (39.0)                 | 99 (40.2)                  |
| Regional                                                      | 123 (35.8)                 | 90 (36.6)                  |
| Remote                                                        | 87 (25.3)                  | 57 (23.2)                  |
| <b>Mothers' highest educational qualification at wave 1</b>   |                            |                            |
| University degree                                             | 22 (6.4)                   | 19 (7.7)                   |
| Diploma/certificate                                           | 155 (45.1)                 | 119 (48.4)                 |
| Year 12                                                       | 33 (9.6)                   | 23 (9.3)                   |
| Less than Year 12                                             | 134 (39.0)                 | 85 (34.6)                  |
| <b>Mothers' participation in paid employment at wave 1</b>    |                            |                            |
| Full time job                                                 | 60 (17.4)                  | 32 (13.0)                  |
| Part time job                                                 | 39 (11.3)                  | 50 (20.3)                  |
| Not in paid employment                                        | 245 (71.2)                 | 164 (66.7)                 |
| <b>Stressful events/social health issues during pregnancy</b> |                            |                            |
| None                                                          | 45 (13.1)                  | 30 (12.2)                  |
| One to two                                                    | 105 (30.6)                 | 77 (31.3)                  |
| Three or more                                                 | 193 (56.3)                 | 139 (56.5)                 |
| <b>Total</b>                                                  | <b>344 (100.0)</b>         | <b>246 (100.0)</b>         |

<sup>1</sup> Non-Aboriginal mothers are mothers of Aboriginal children
